# Supplementary material
Source: HighWire-hosted journal article supplement (doi:10.1101/rna.079933.123)
Supplement: Supplemental_Fig_S2.pdf [file Supplemental_Fig_S2.pdf]

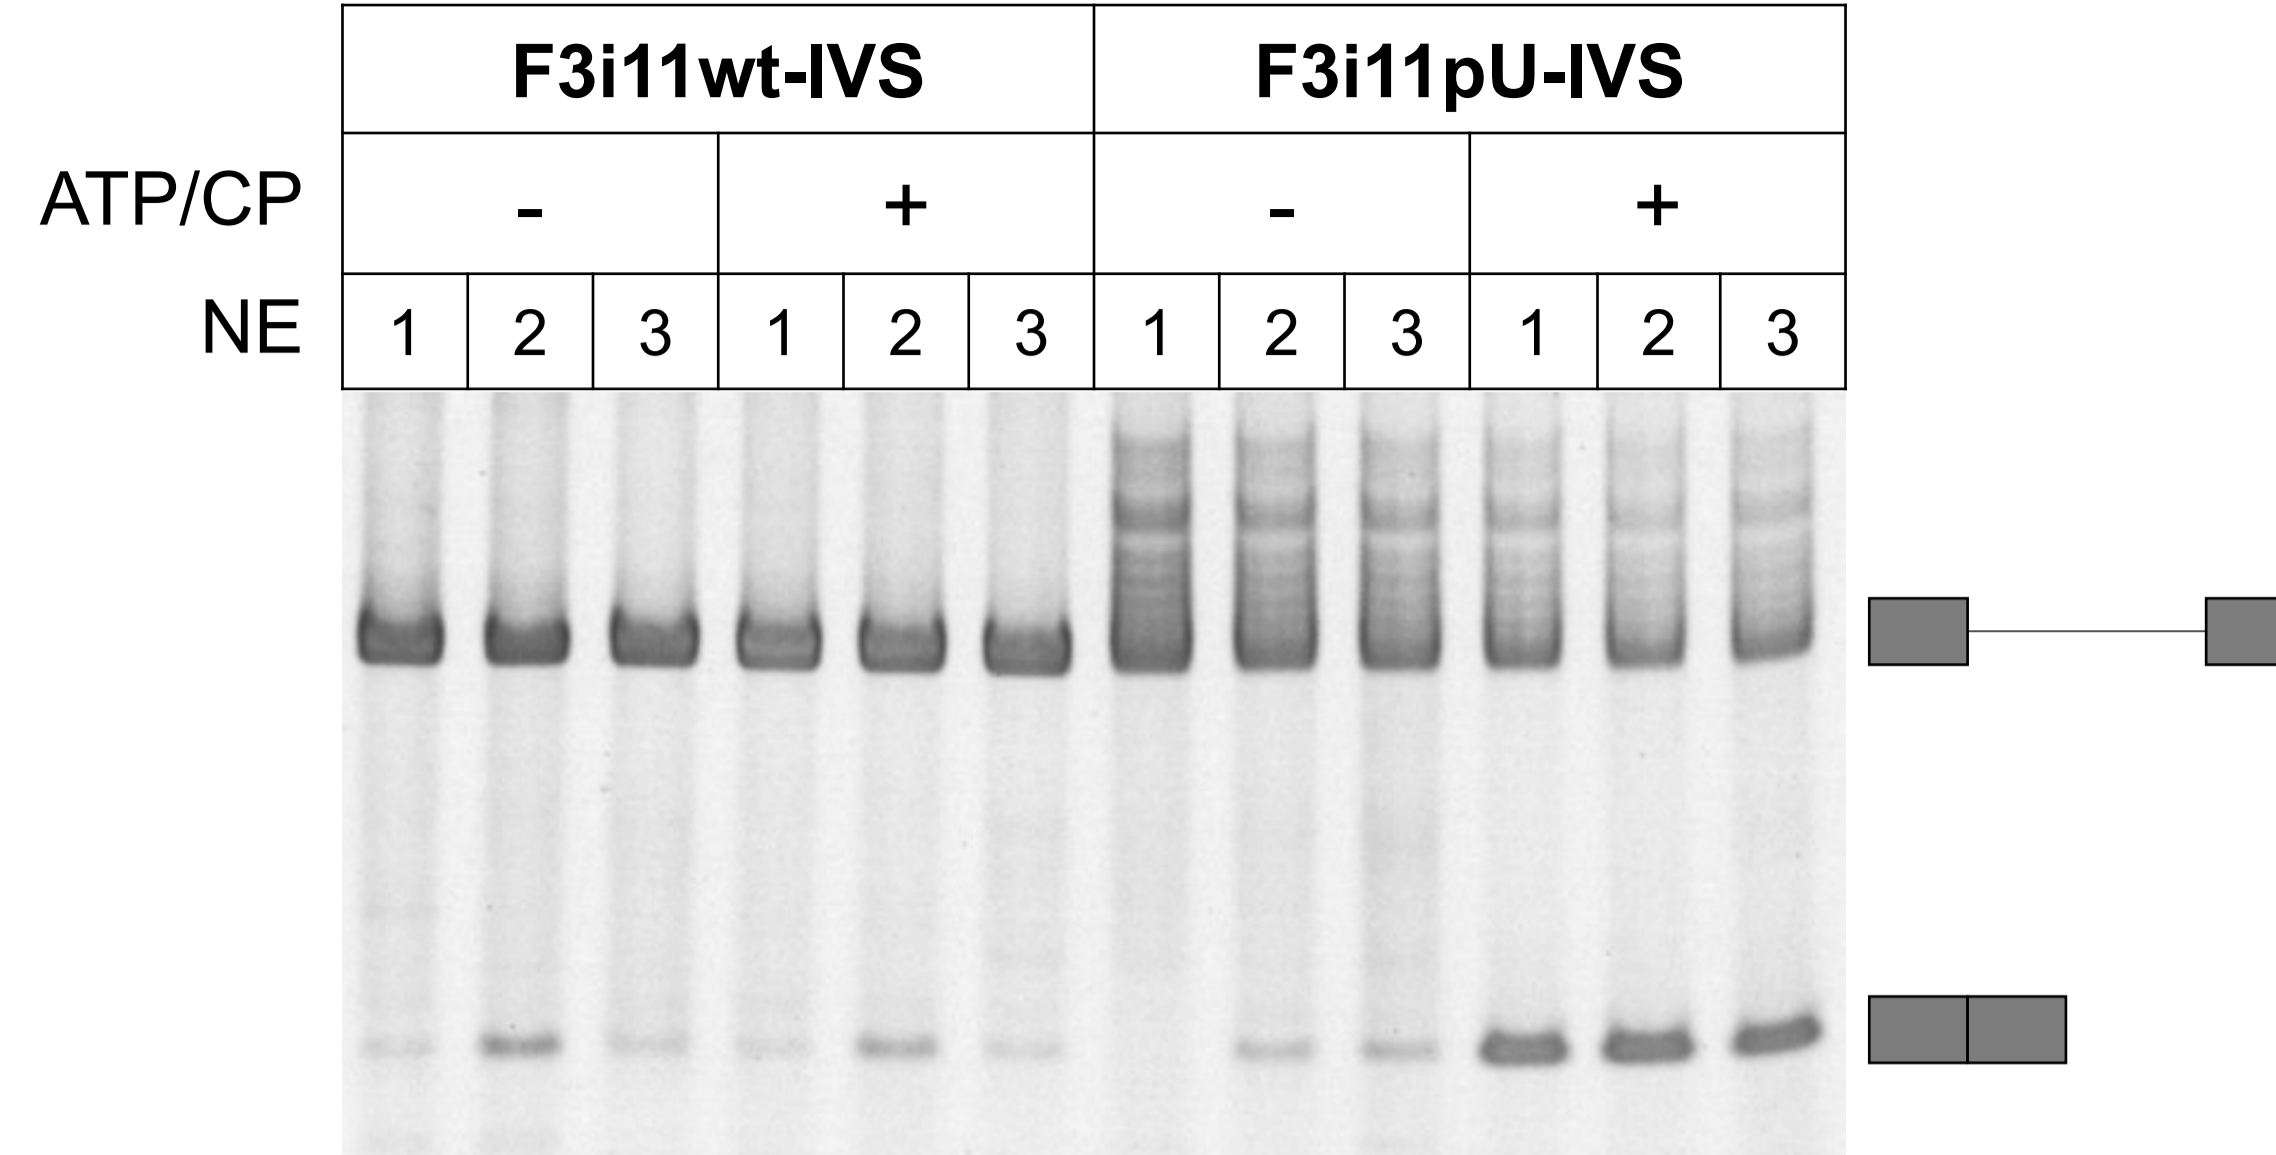

*In vitro* splicing of F3i11-IVS substrates in three independent nuclear extracts (1-3) measured via end-point RT-PCR. (Notes: 1) NE#2 contained more U2AF2 and DDX39B protein. 2) Multiple bands above unspliced F3i11pU-IVS most likely a result of polymerase slippage during PCR.) Related to Figure 1.
