# Supplementary material
Source: HighWire-hosted journal article supplement (doi:10.1101/rna.079933.123)
Supplement: Supplemental_Fig_S3.pdf [file Supplemental_Fig_S3.pdf]

### Loading Plot

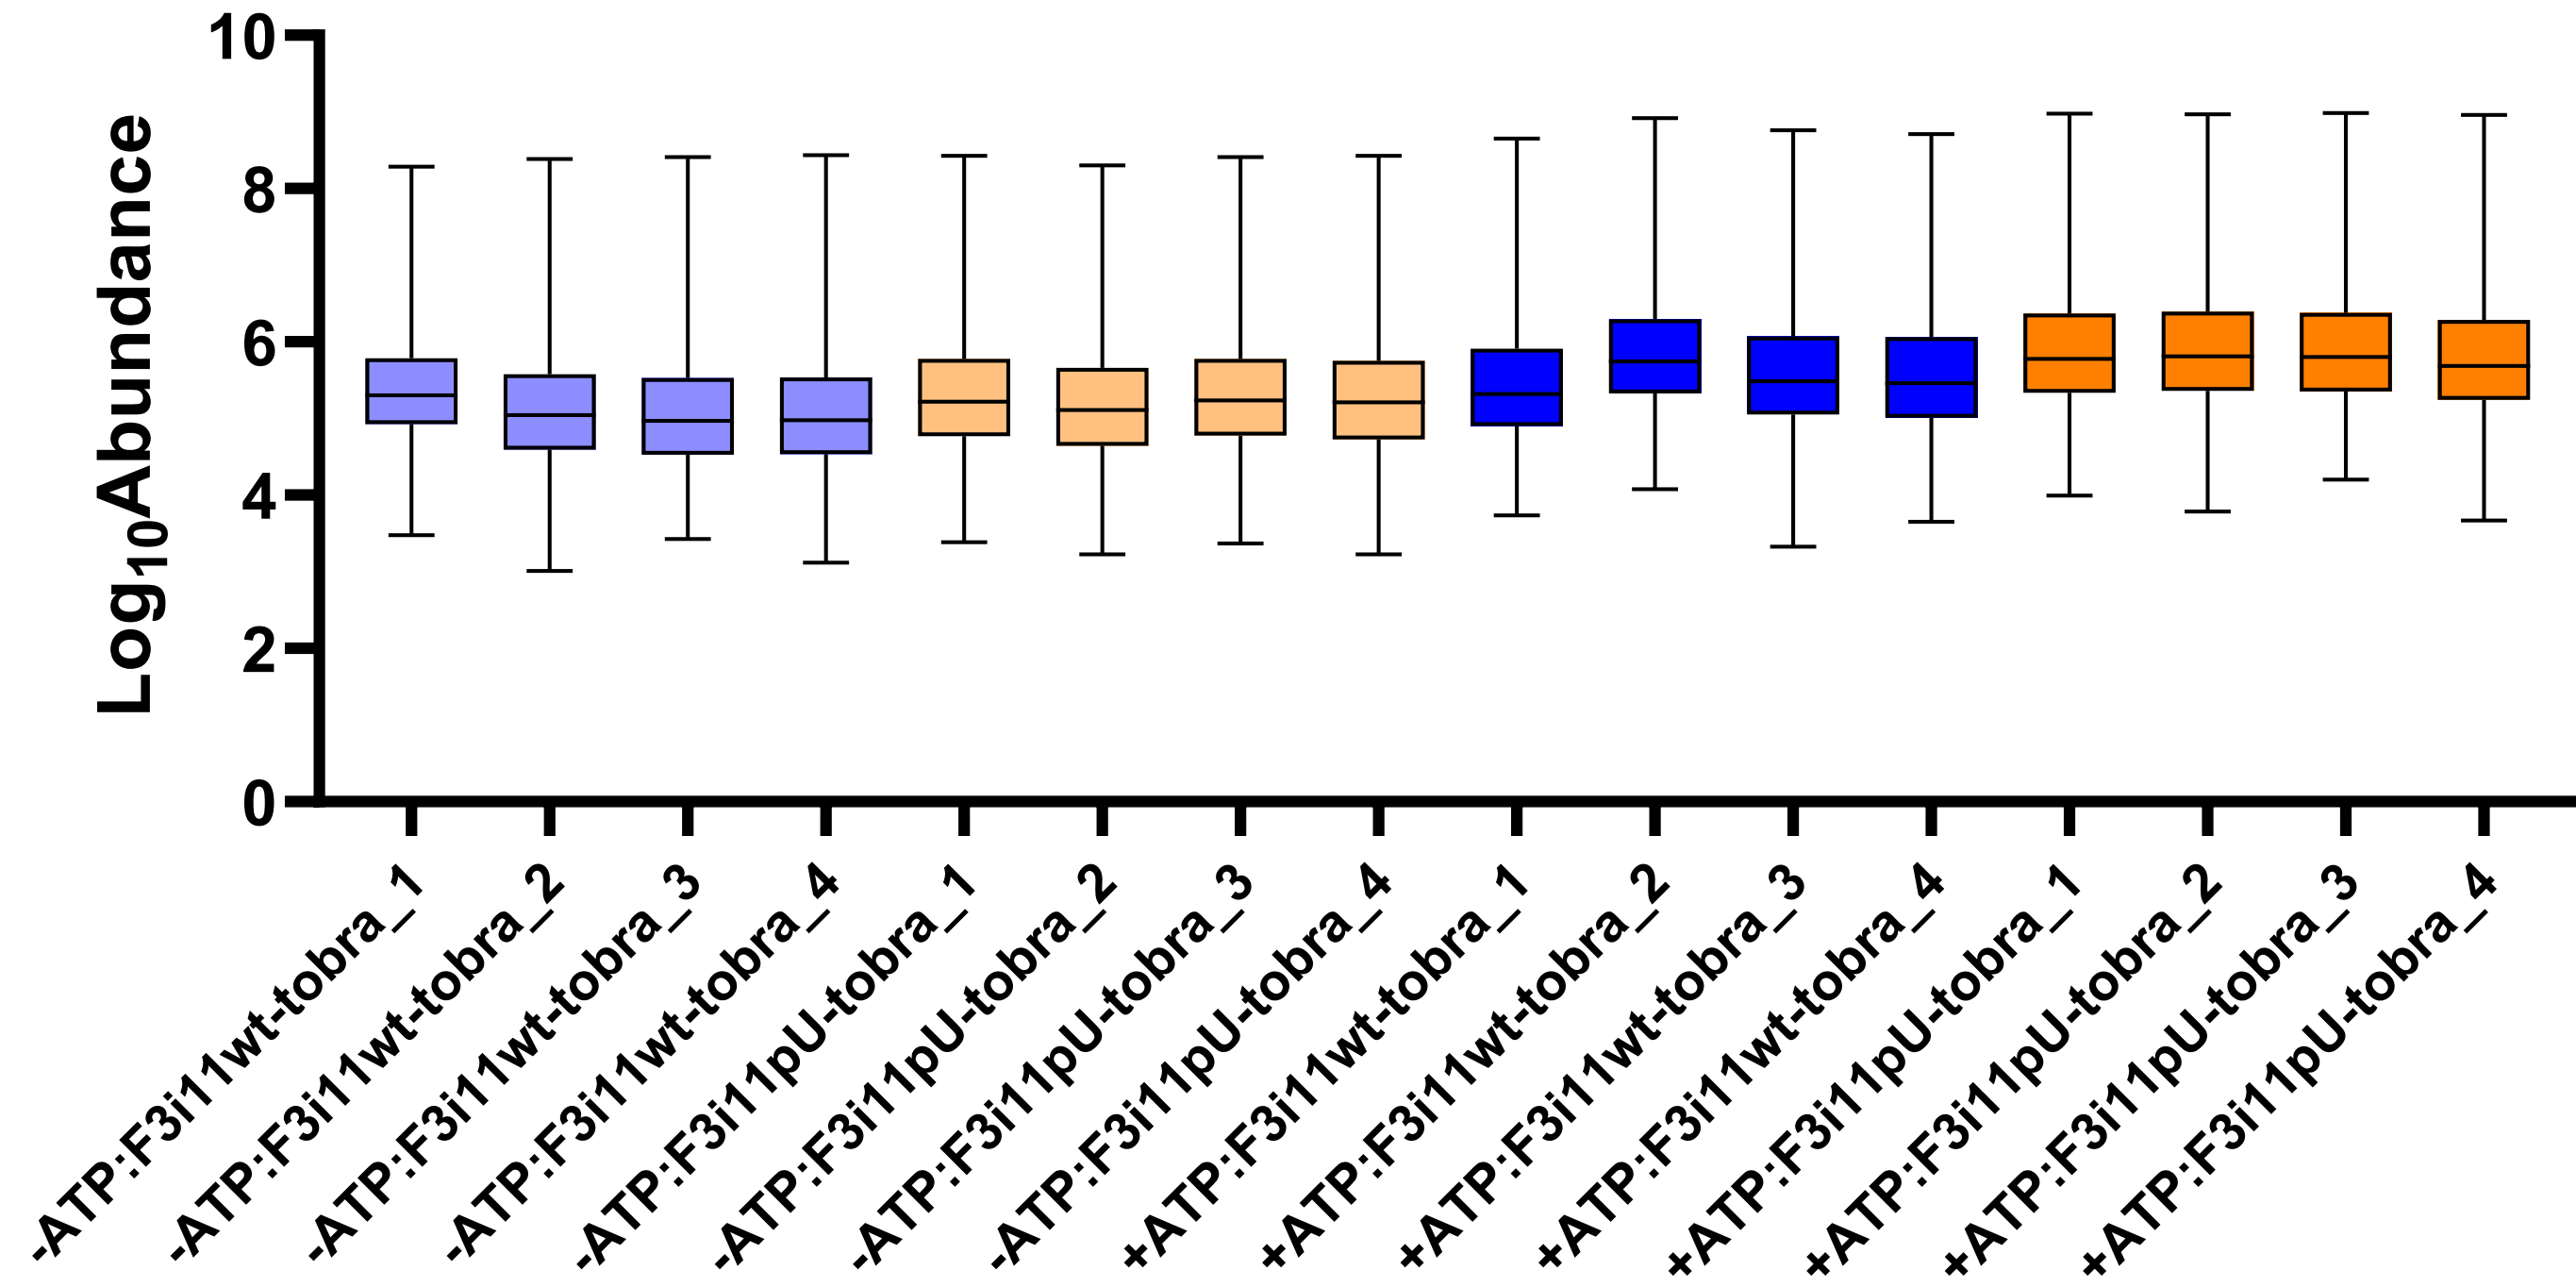

### Minus ATP

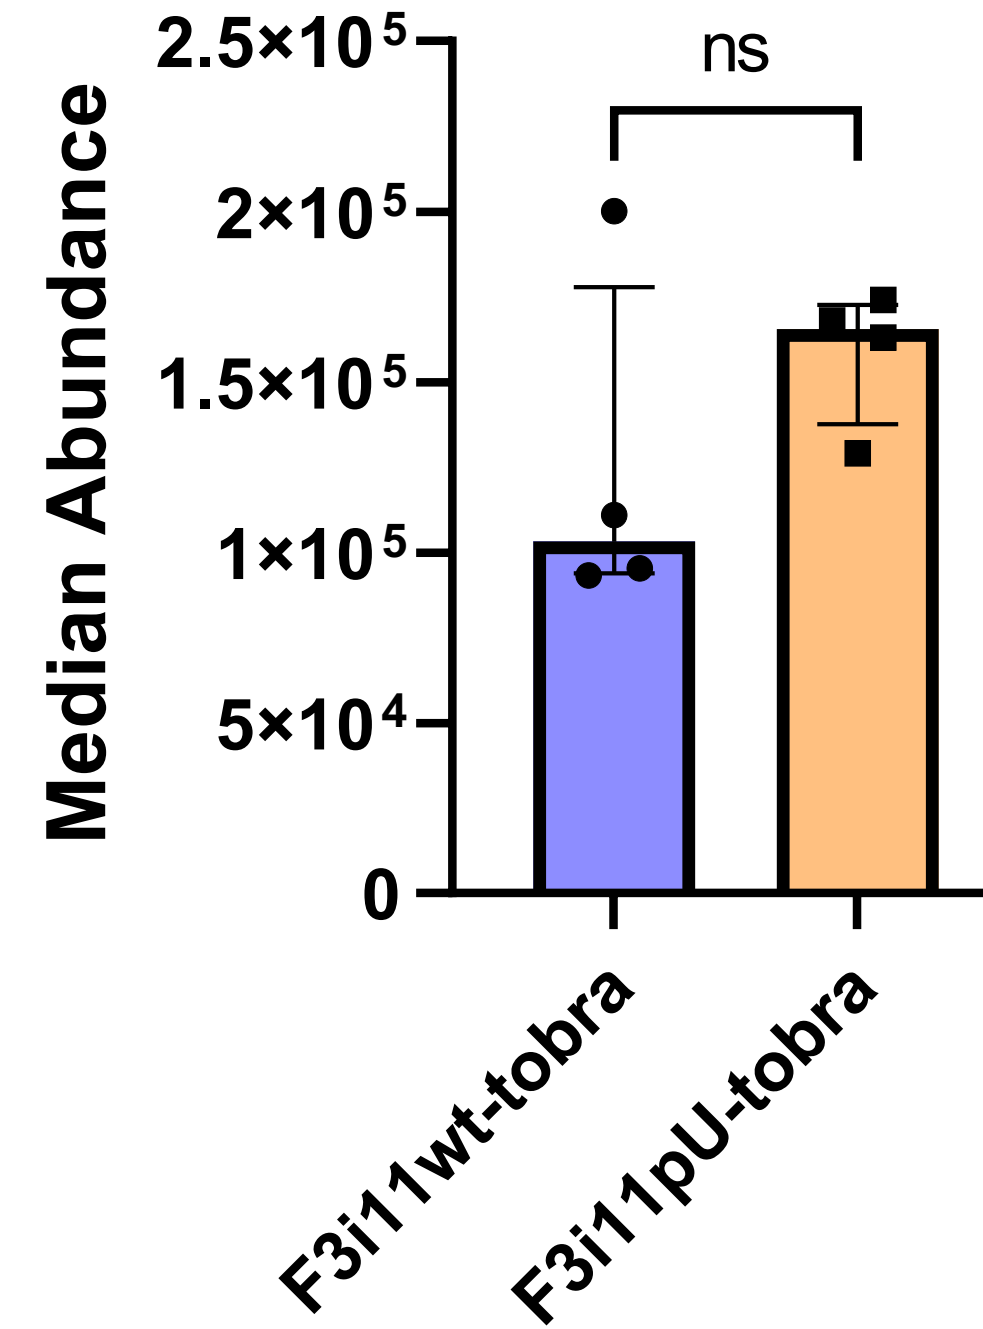

### Plus ATP

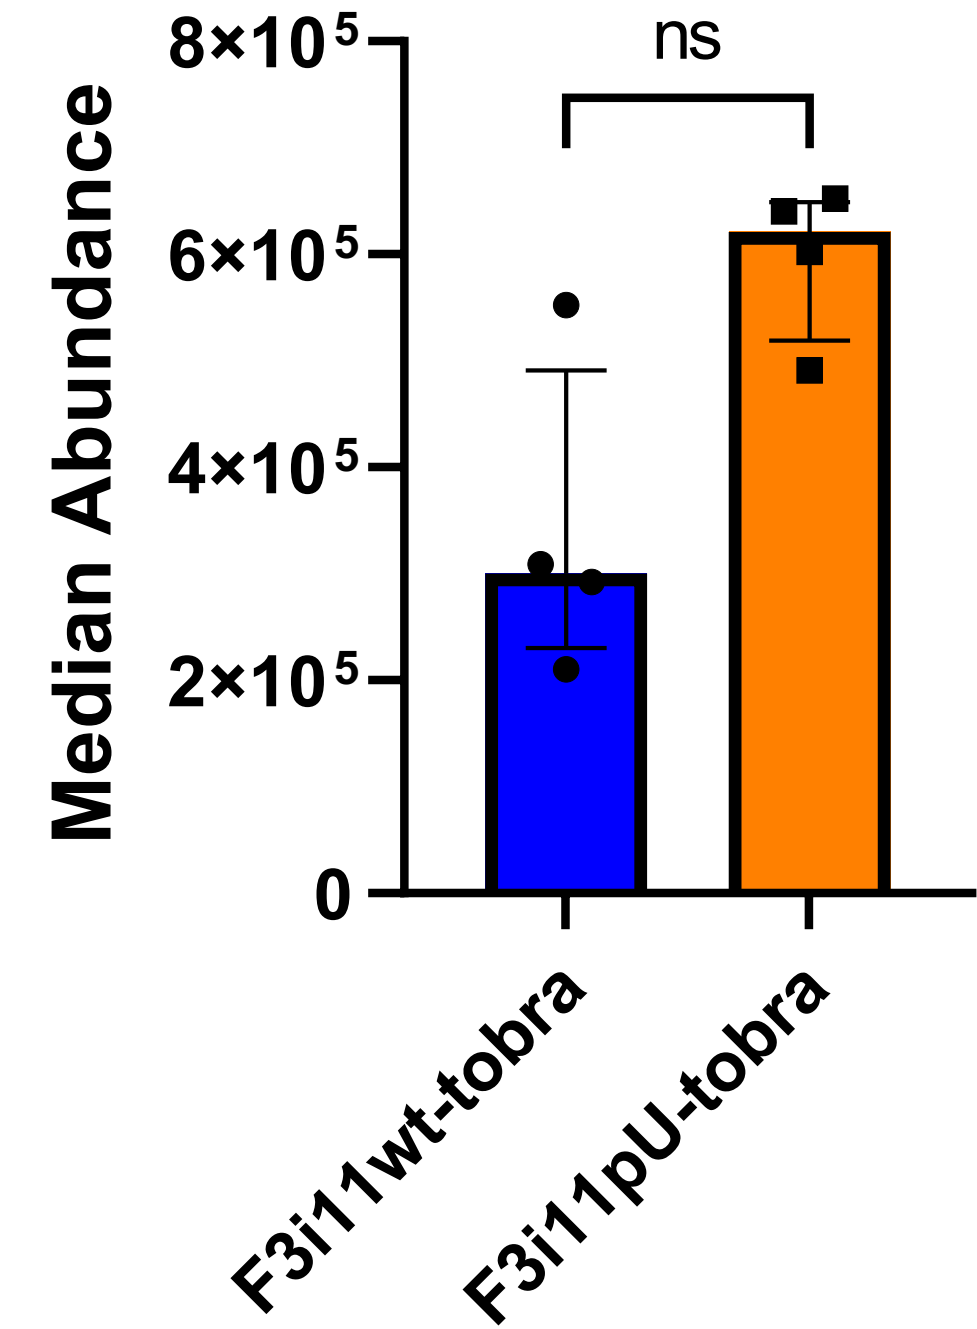

Log<sub>10</sub> transformed raw protein abundance values of all proteins in each replicate of each condition (-ATP:F3i11wt-tobra = light blue, -ATP:F3i11pU-tobra = light orange, +ATP:F3i11wt-tobra = blue, +ATP:F3i11pU-tobra = orange). Bar graphs comparing the medians ± interquartile range of all raw protein abundance values for each condition. Statistical test performed was Mann-Whitney test. Related to Figures 3 and 4.
