# Supplementary material
Source: HighWire-hosted journal article supplement (doi:10.1101/rna.079933.123)
Supplement: Supplemental_Fig_S4.pdf [file Supplemental_Fig_S4.pdf]

## U1-70K

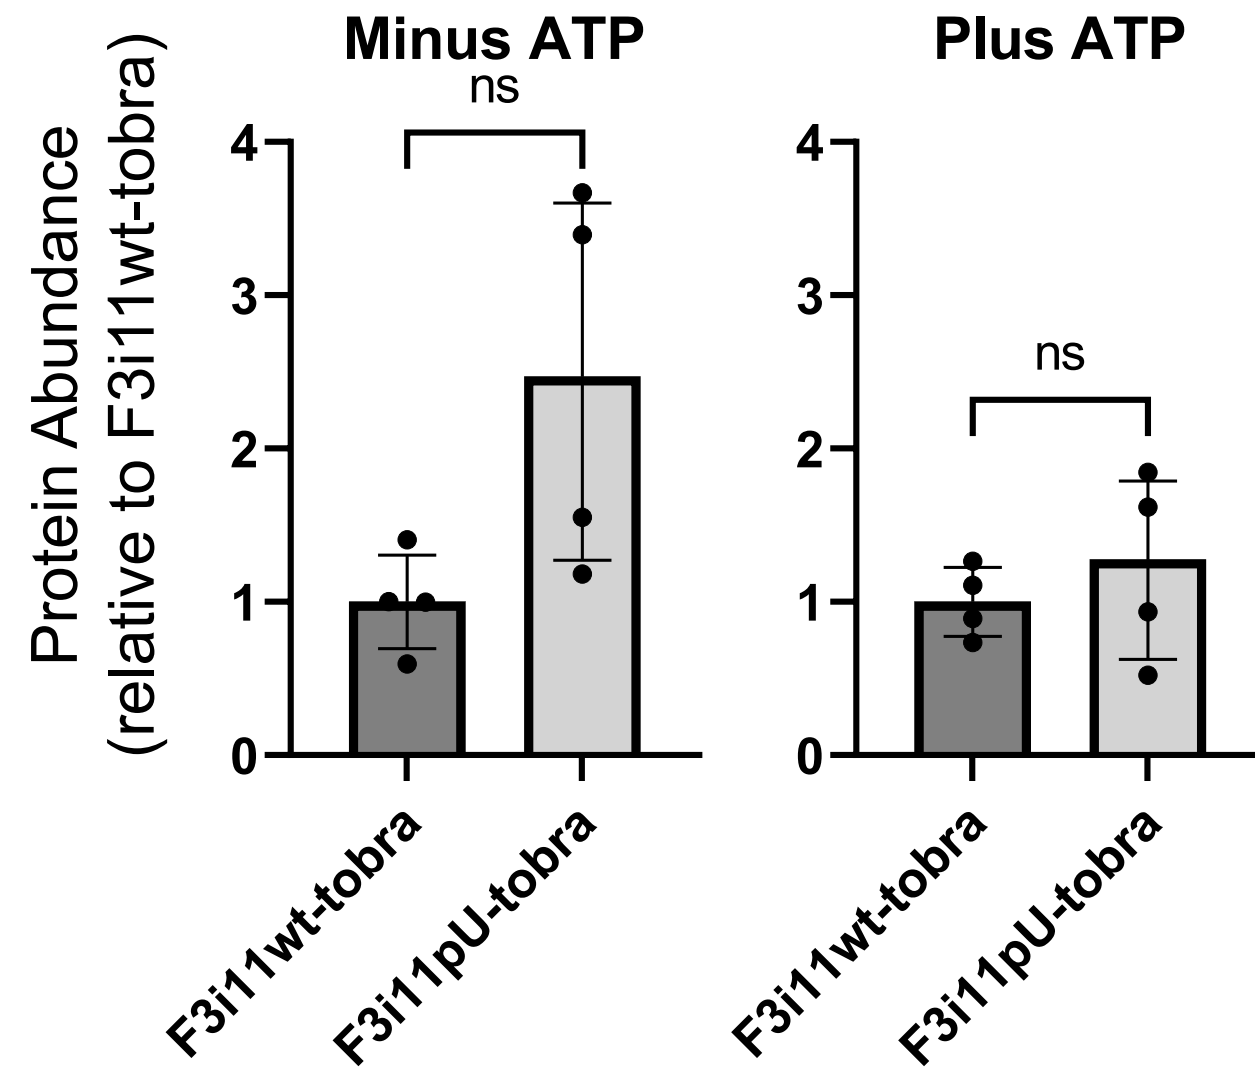

## U2AF2

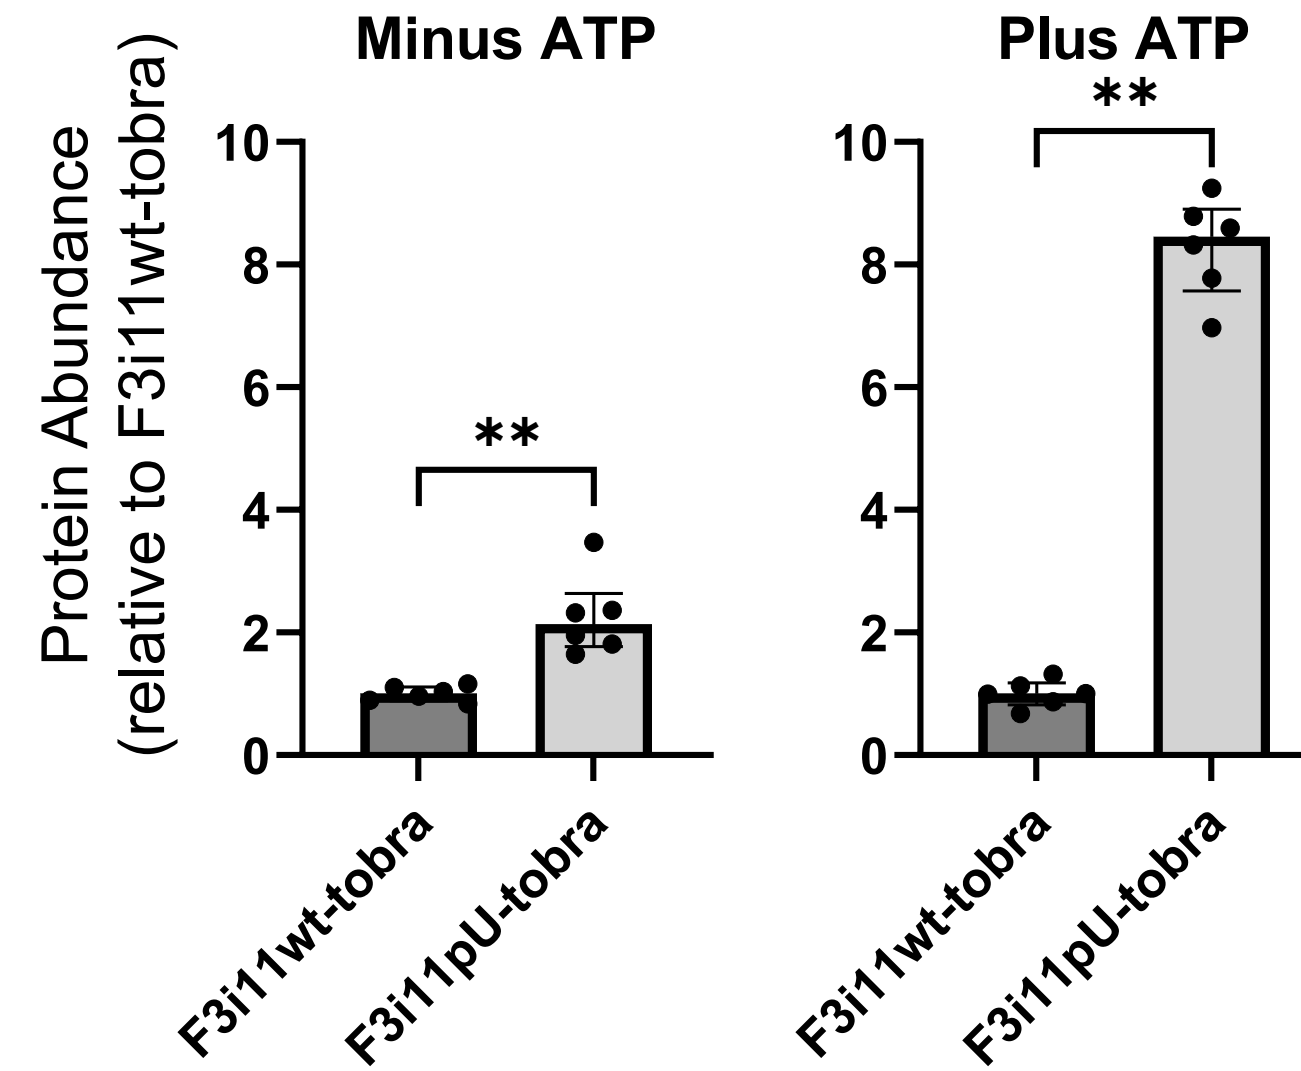

## SF3B1

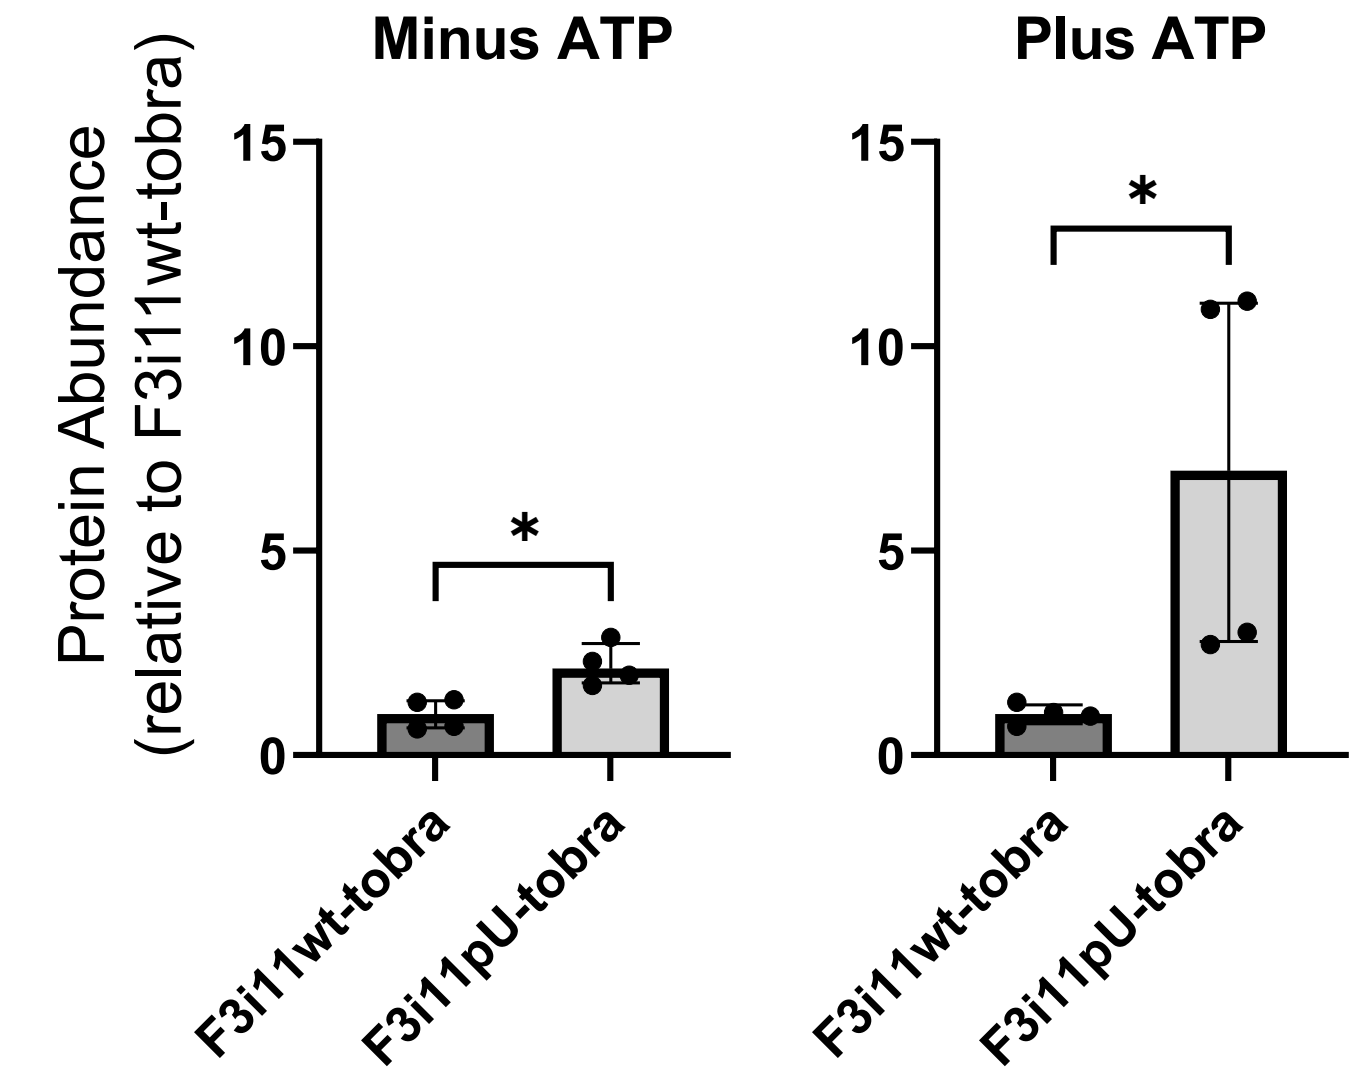

Quantification of western blot analyses of U1-70K, U2AF2 and SF3B1 binding to F3i11wt-tobra and F3i11pU-tobra. Depicted in each bar graph is the median  $\pm$  interquartile range of four or six replicates from two or three independent experiments, respectively (\*  $p < 0.05$ , \*\*  $p < 0.01$ ; Mann-Whitney test). These experiments were independent of those that were used for mass spectrometry analyses and used different nuclear extract preparations. Related to Figures 3 and 4.
