# Supplementary material
Source: HighWire-hosted journal article supplement (doi:10.1101/rna.079933.123)
Supplement: Supplemental_Fig_S5.pdf [file Supplemental_Fig_S5.pdf]

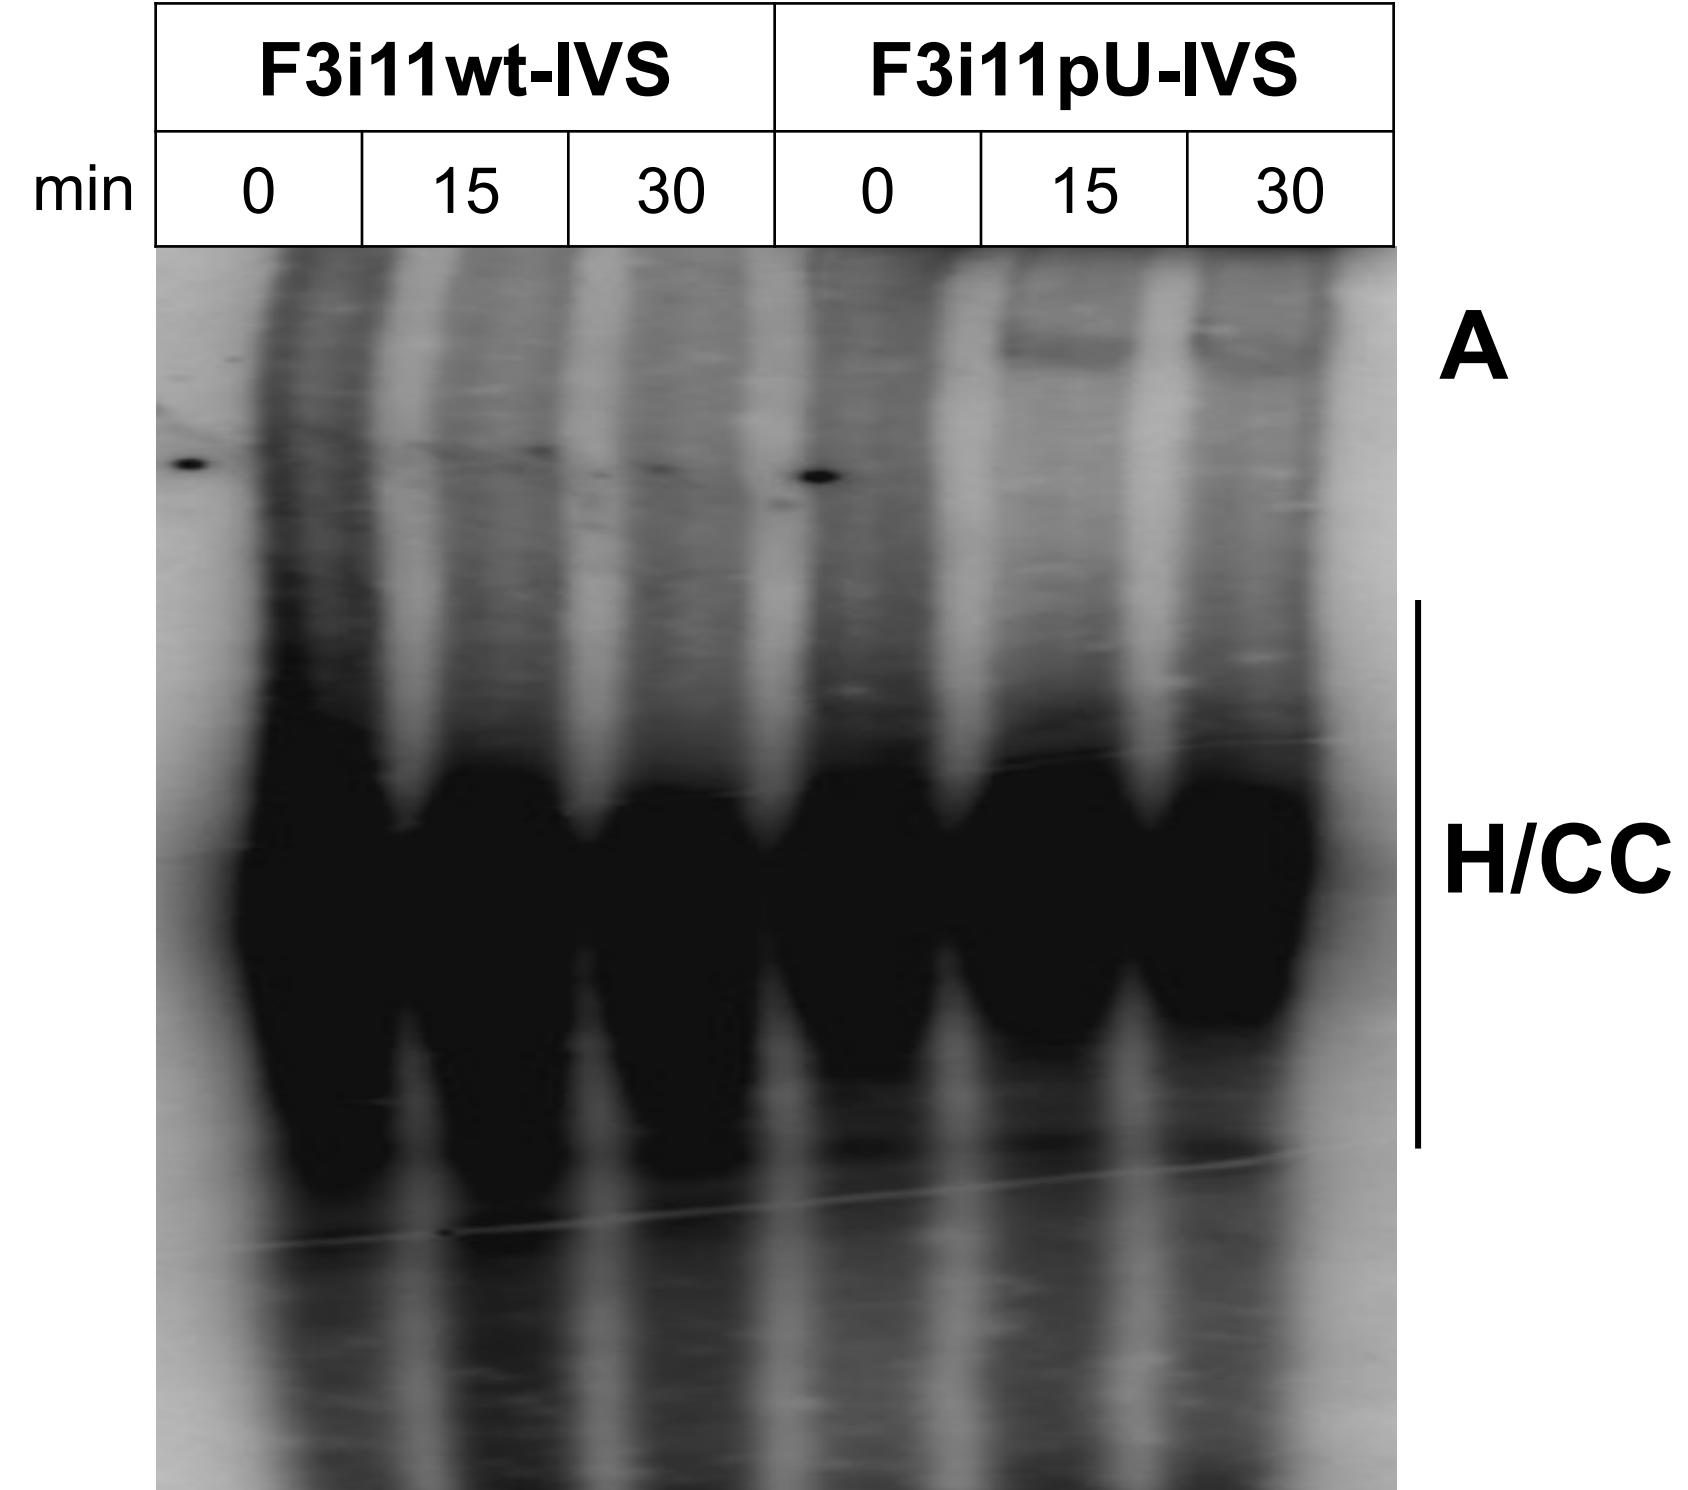

Native gel electrophoresis depicting H/CC and A complex formation on F3i11wt-IVS and F3i11pU-IVS RNAs over time. Representative image of three replicates. Related to Figure 4.
